# Supplementary material for: MicroRNA-17 is downregulated in esophageal adenocarcinoma cancer stem-like cells and promotes a radioresistant phenotype
Source: PubMed Central journal article supplement (PMC5355274; doi:10.18632/oncotarget.13940), 2016-12-15
Supplement: oncotarget-08-11400-s001.pdf [file oncotarget-08-11400-s001.pdf]

## **MicroRNA-17 is downregulated in esophageal adenocarcinoma cancer stem-like cells and promotes a radioresistant phenotype**

### **SUPPLEMENTARY MATERIALS AND METHODS**

#### **Quantitative PCR**

miR-17-5p overexpression was confirmed in OE33 R transfected cells at 24 h post transfection. Total RNA (10 ng) was reverse transcribed to cDNA using a TaqMan® MicroRNA Reverse Transcription Kit (Thermo Fisher Scientific), as per the manufacturer's instructions.

qPCR was performed using a TaqMan® miRNA assay kit (Thermo Fisher Scientific) and RNU6B was used as an endogenous control for data normalization. qPCR was performed using an ABI Prism 7900HT real-time thermal cycler (Thermo Fisher Scientific). qPCR data were analysed by the  $2^{-\Delta\Delta Ct}$  method.

## SUPPLEMENTARY FIGURES

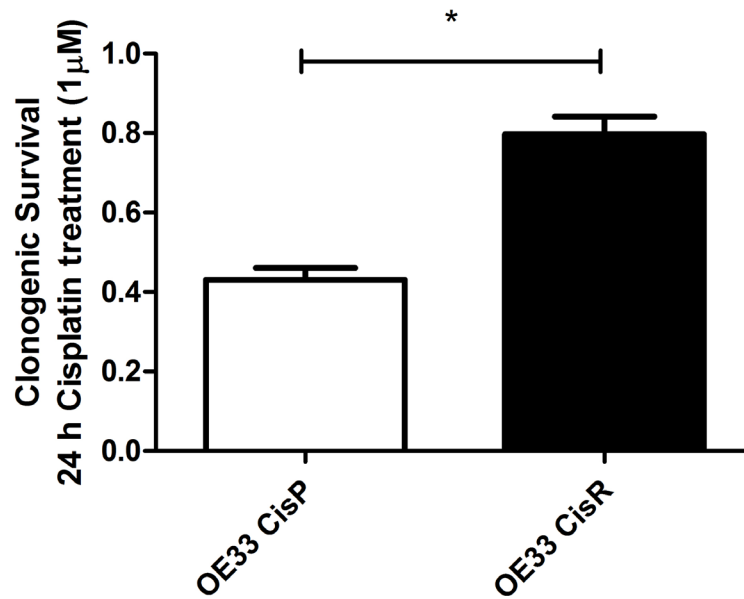

**Supplementary Figure 1: Clonogenic survival was assessed in OE33 CisP and OE33 CisR cell lines following 24 h treatment with cisplatin (1 μM).** OE33 CisR cells demonstrated significant resistance to cisplatin, when compared to OE33 CisP cells. Data are presented as mean ± SEM from 3 independent experiments. Statistical analysis was performed using a two-tailed paired Student's *t*-test, \**p* < 0.05.

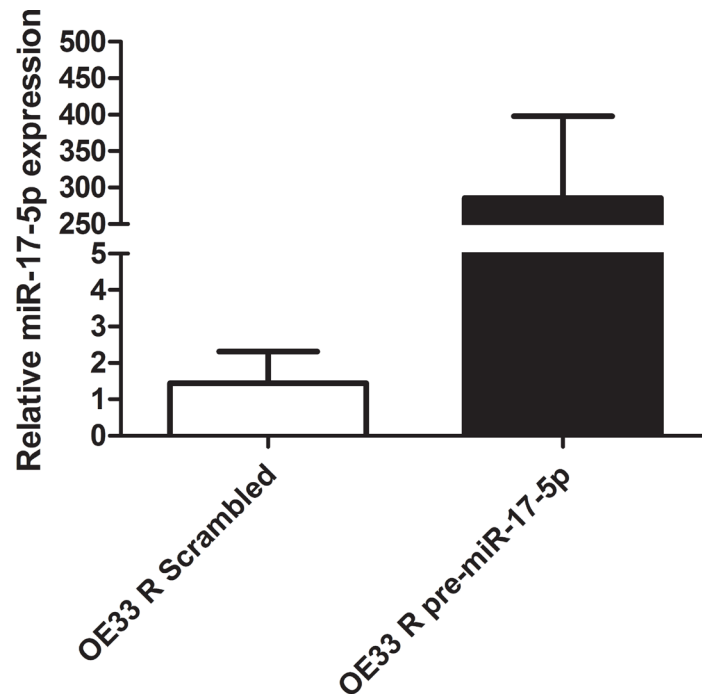

Supplementary Figure 2: miR-17-5p expression was measured by qPCR in OE33 R cells transfected with either pre-miR-17-5p or a scrambled non targeting control.
